# Supplementary material
Source: PubMed Central journal article supplement (PMC3908871)
Supplement: NIHMS55604-supplement-2.pdf [file NIHMS55604-supplement-2.pdf]

## Supplementary Datafile 3

Interproscan (<http://www.ebi.ac.uk/Tools/pfa/iprscan/>) profiles of identified components from the screen for drivers of stumpy formation. Hits targeting purine metabolism are not shown.

# Tb927.2.1810

## ISWI CHROMATIN-REMODELING COMPLEX ATPASE ISW1 (PTHR10799:SF73)

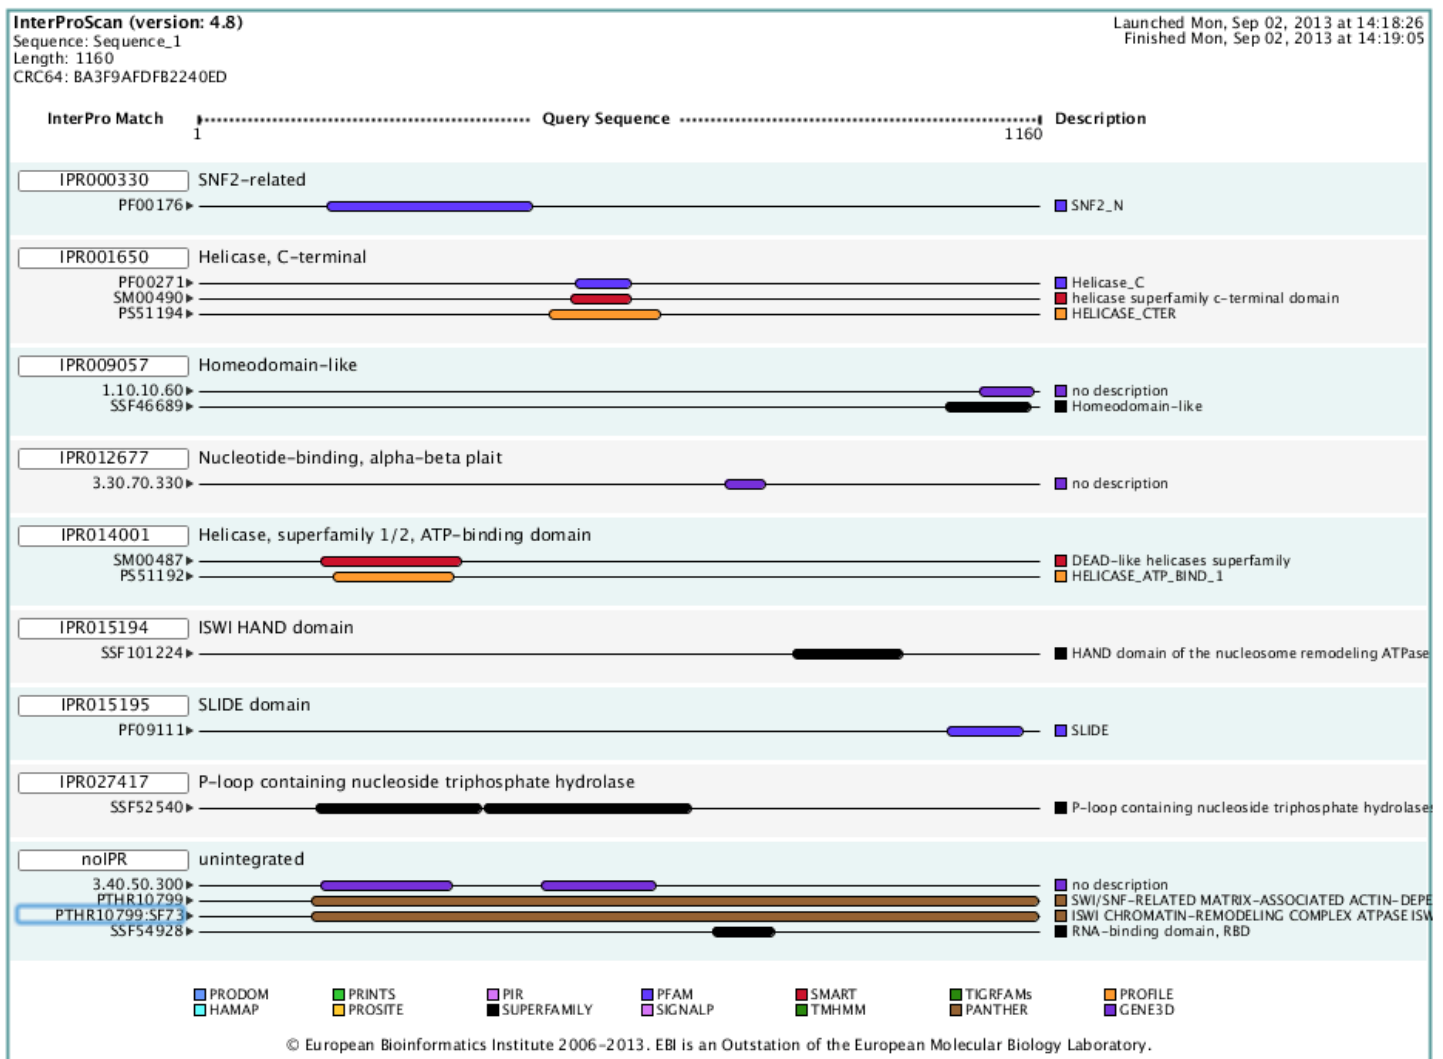

### Reference:

[A novel ISWI is involved in VSG expression site downregulation in African trypanosomes.](#)

Hughes K, Wand M, Foulston L, Young R, Harley K, Terry S, Ersfeld K, Rudenko G. EMBO J. 2007 May 2;26(9):2400-10. Epub 2007 Apr 12.

# Tb927.2.2720

## MITOGEN-ACTIVATED KINASE KINASE KINASE (PTHR24361)

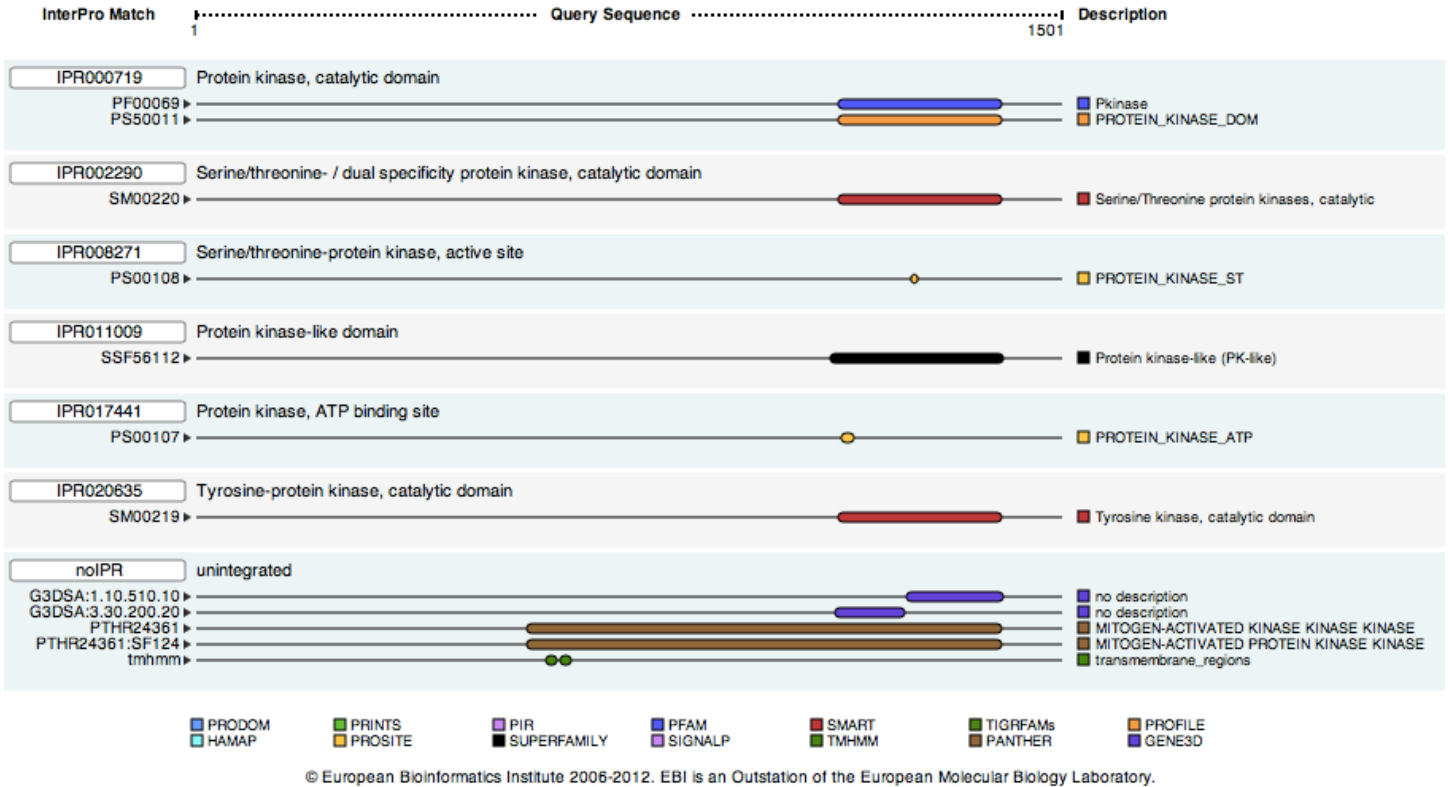

# Tb927.2.4020

## NEDD8-ACTIVATING ENZYME E1 REGULATORY SUBUNIT (AMYLOID PROTEIN-BINDING PROTEIN 1) (AMYLOID BETA PRECURSOR PROTEIN-BINDING PROTEIN 1, 59 KDA)(APP-BP1) (PTHR10953:SF29)

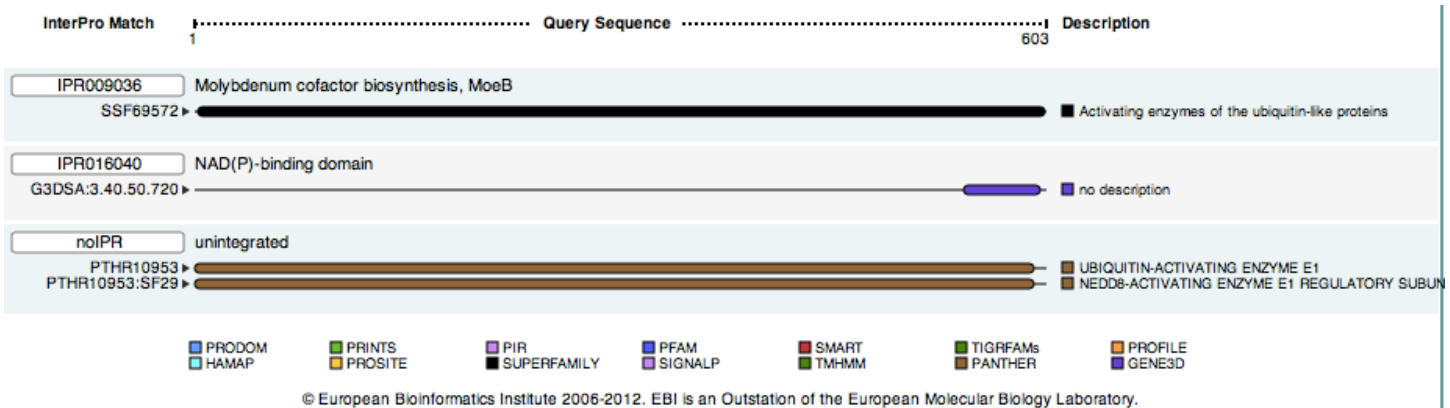

# Tb927.3.4560

## CARBON CATABOLITE-DEREPRESSING PROTEIN KINASE (PTHR24343:SF15)

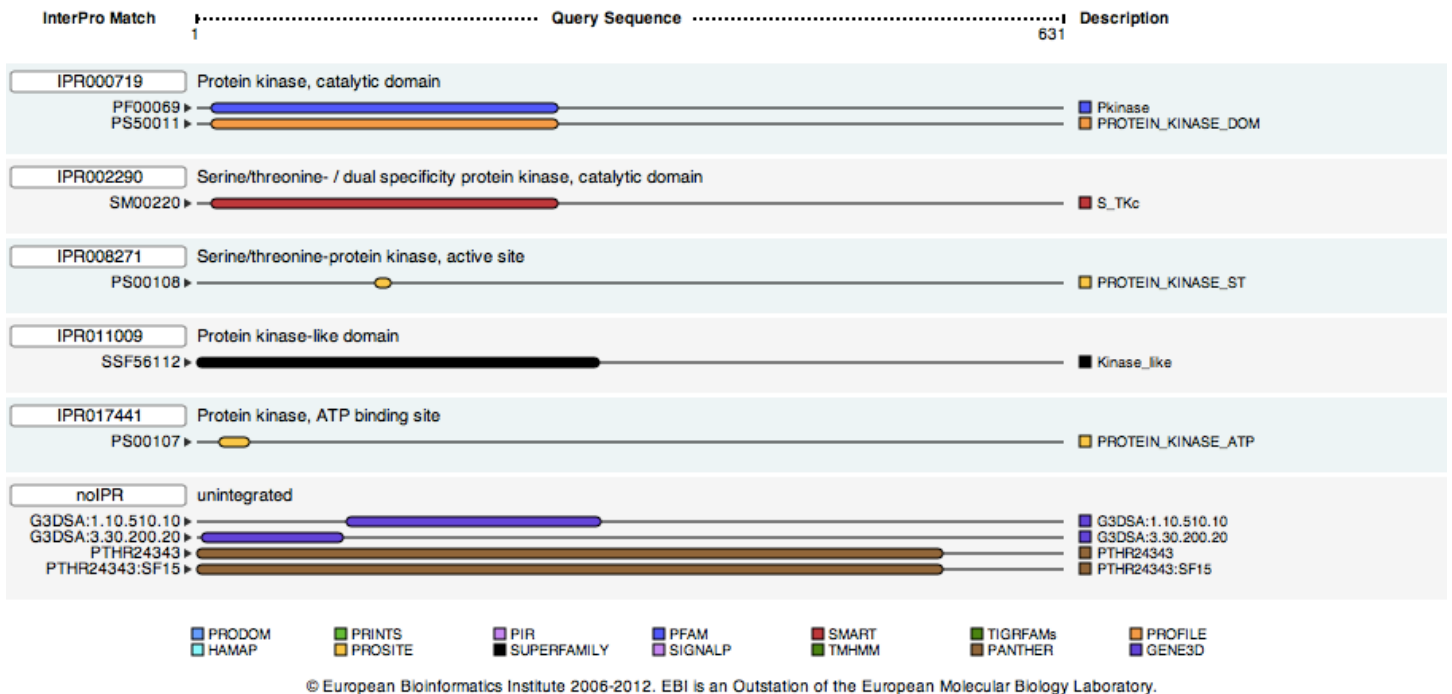

# Tb927.4.3620/30/40

## SERINE/THREONINE PROTEIN PHOSPHATASE (PTHR11668:SF110)

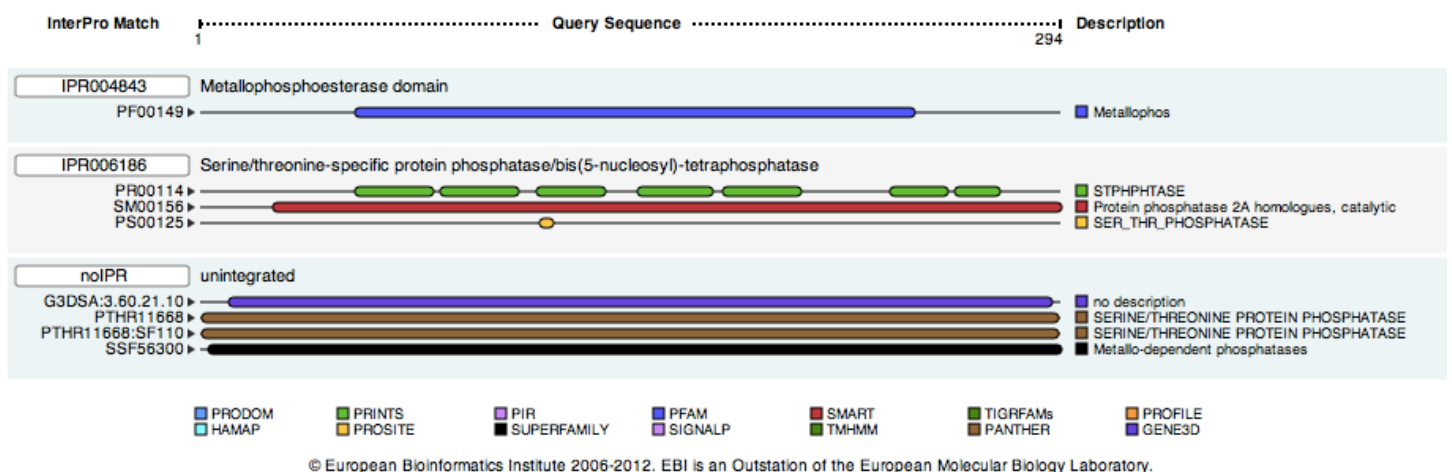

### Reference:

[Okadaic acid overcomes the blocked cell cycle caused by depleting Cdc2-related kinases in Trypanosoma brucei.](#)

Li Z, Tu X, Wang CC. Exp Cell Res. 2006 Nov 1;312(18):3504-16. Epub 2006 Aug 2.

# Tb927.7.7160

## DUAL SPECIFICITY PROTEIN PHOSPHATASE (PTHR10159)

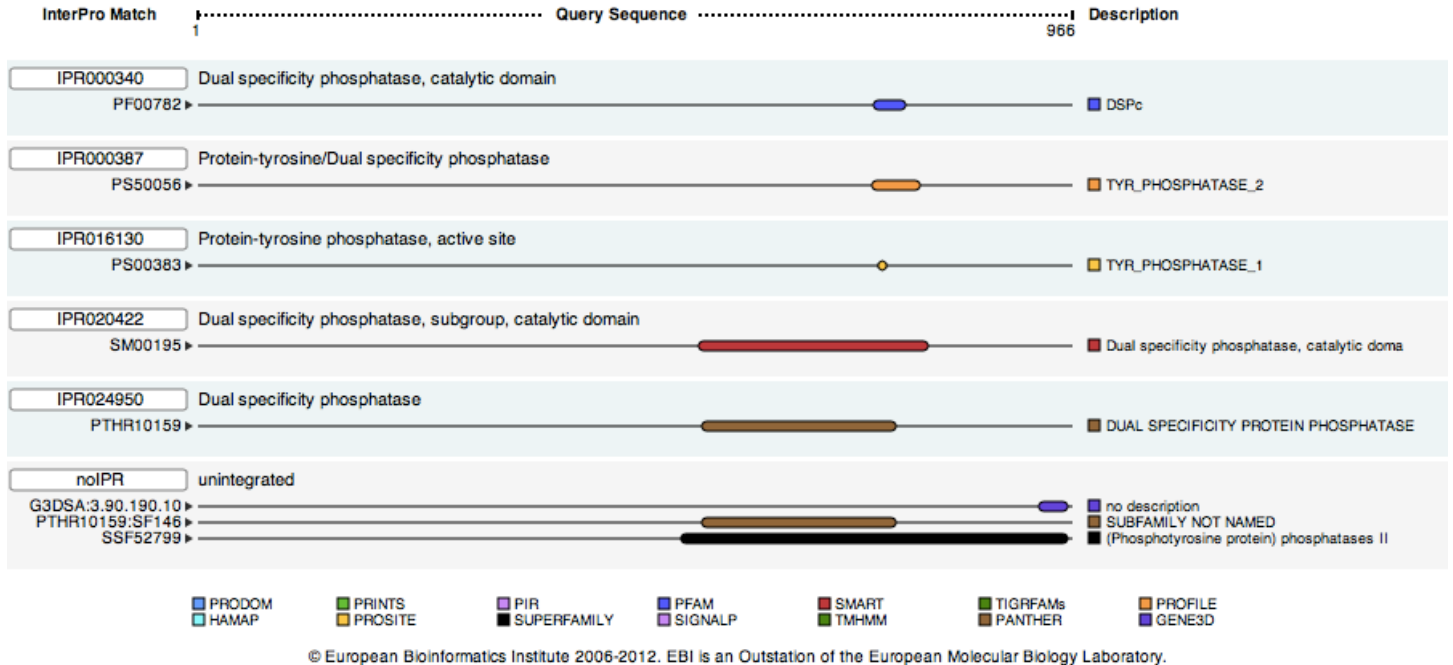

# Tb927.9.4080 (HYP2 )

## PROSITE PDOC00846

### Prokaryotic dksA C4-type zinc finger signature and profile

### SSF52540 P-loop containing nucleoside triphosphate hydrolases

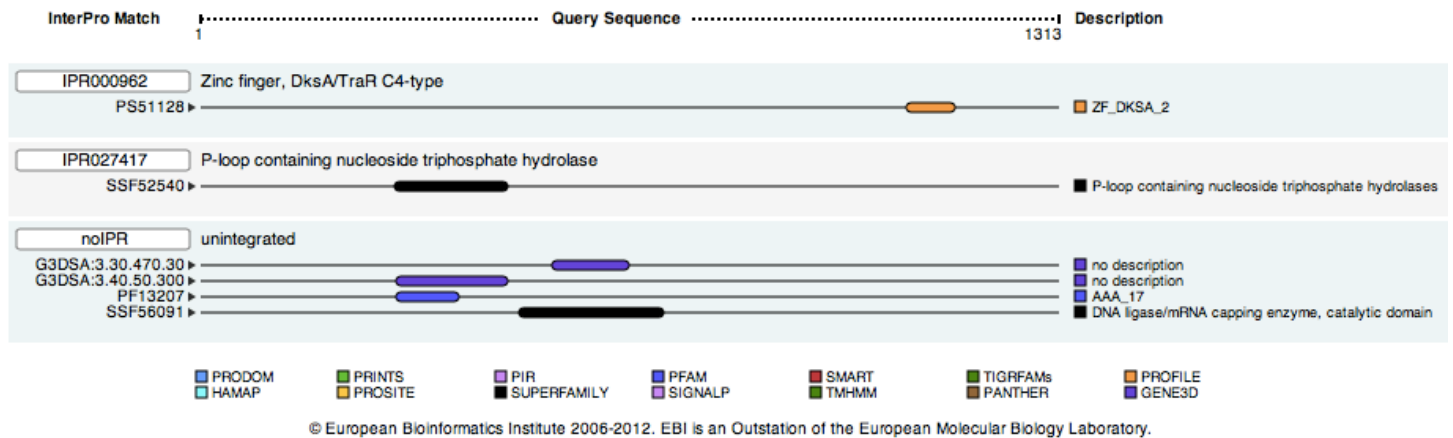

# Tb927.10.5930/40/50

## SERINE/THREONINE-PROTEIN KINASE NEK (PTHR24362)

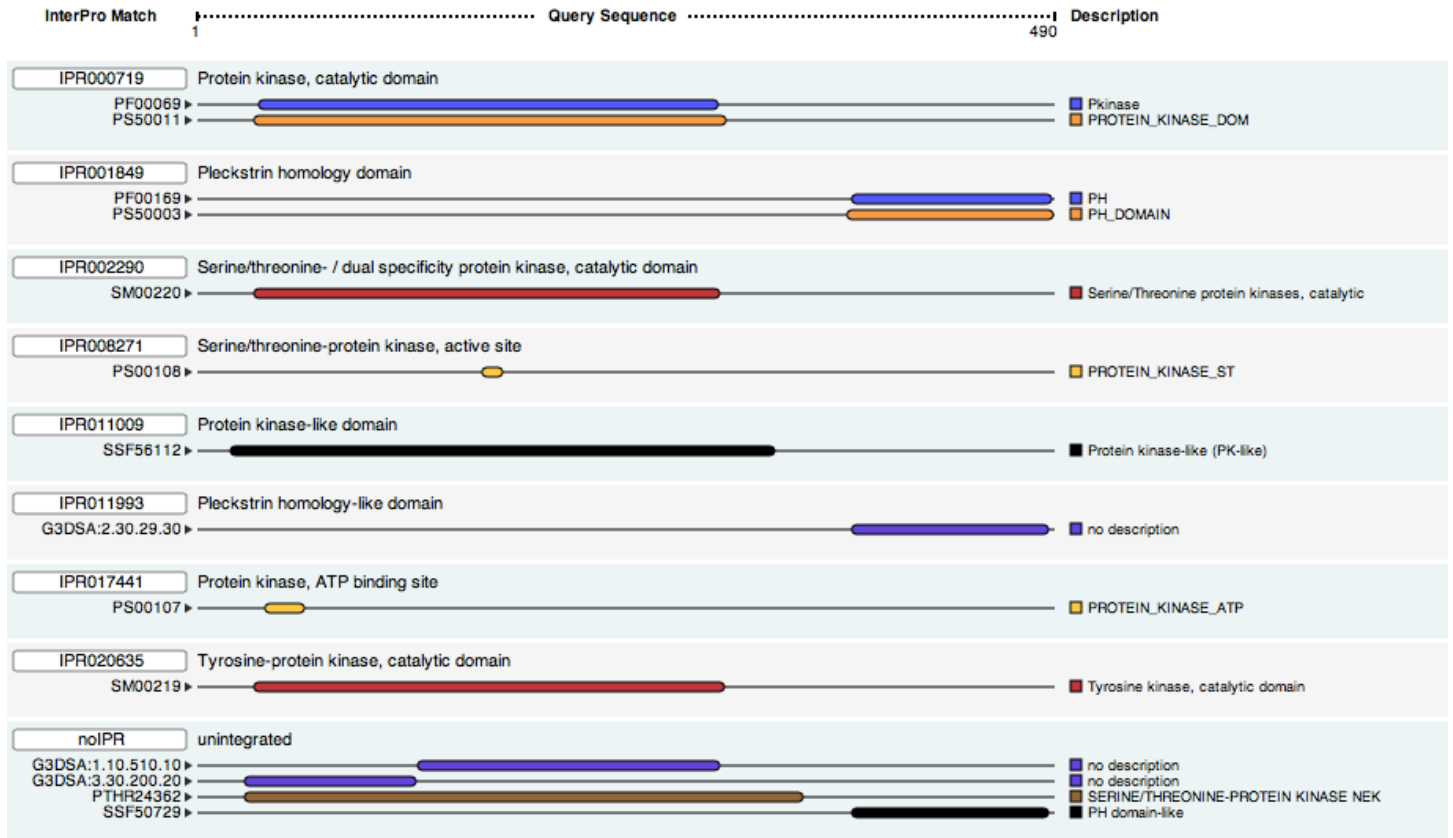

© European Bioinformatics Institute 2006-2012. EBI is an Outstation of the European Molecular Biology Laboratory.

# Tb927.10.12090/100

## PS50102 Eukaryotic RNA Recognition Motif (RRM) profile

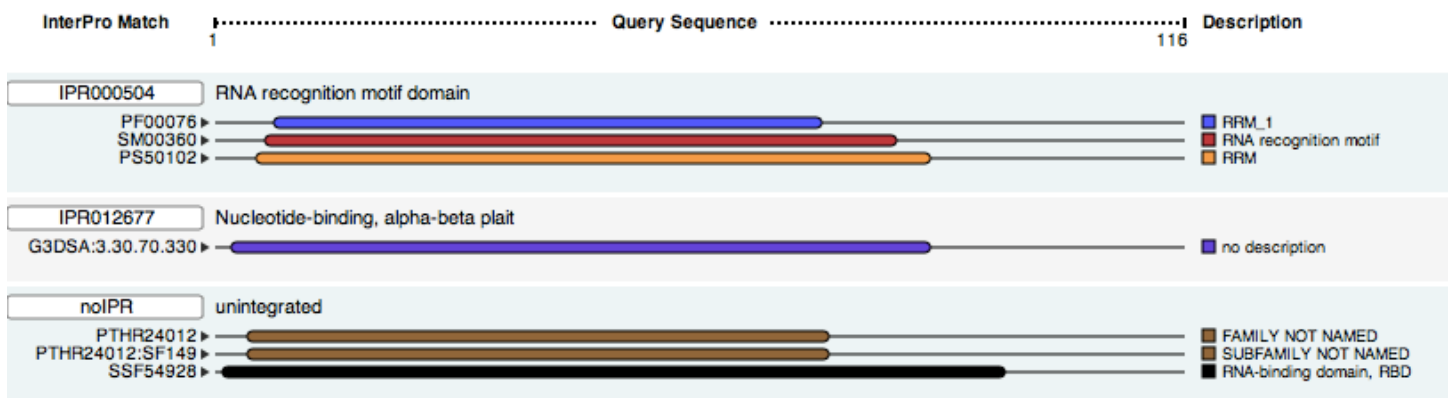

© European Bioinformatics Institute 2006-2012. EBI is an Outstation of the European Molecular Biology Laboratory.

# Tb927.10.15020

## DUAL SPECIFICITY PROTEIN KINASE YAK1 (PTHR24058:SF17)

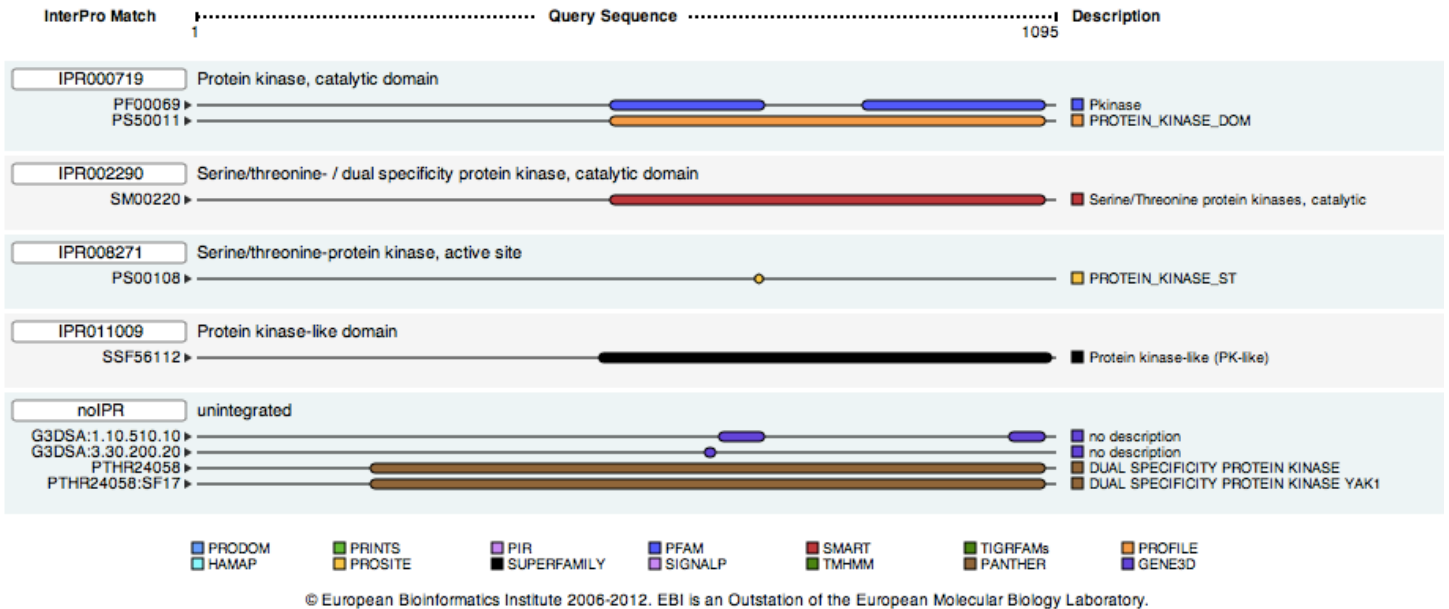

# Tb927.11.290

## PROTEIN-TYROSINE PHOSPHATASE MITOCHONDRIAL 1 (PTHR10159:SF5)

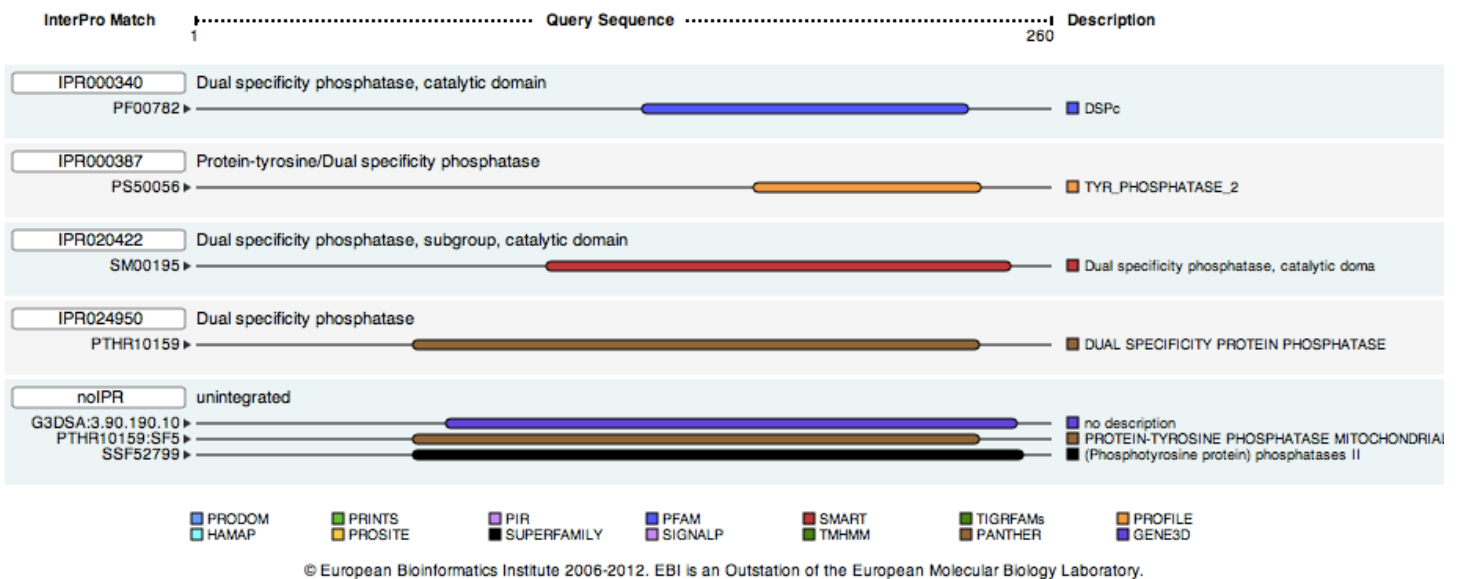

# Tb927.11.300

## BUD13 (PF09736): PRE-MRNA-SPLICING FACTOR OF RES COMPLEX

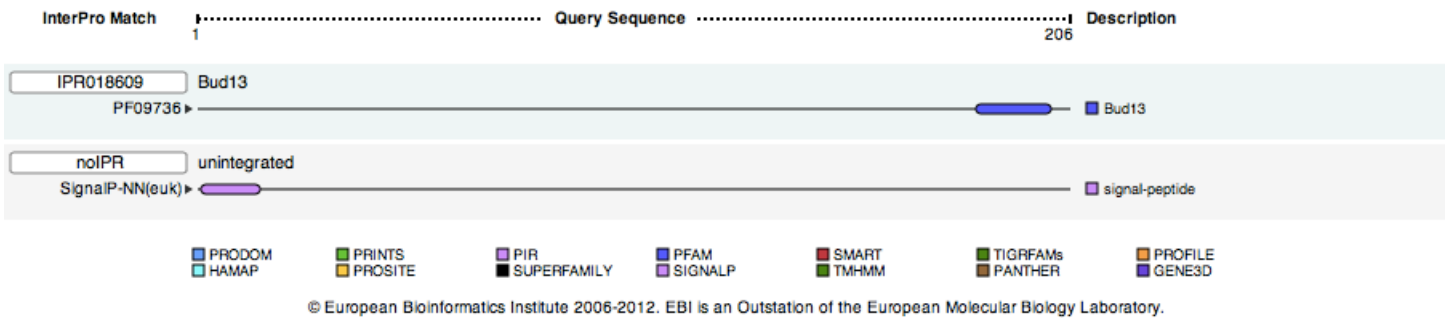

# Tb927.11.750

## DNA REPAIR HELICASE RAD5,16 (PTHR10799:SF62) SWI/SNF-RELATED MATRIX-ASSOCIATED ACTIN-DEPENDENT REGULATOR OF CHROMATIN SUBFAMILY-RELATED (PTHR10799)

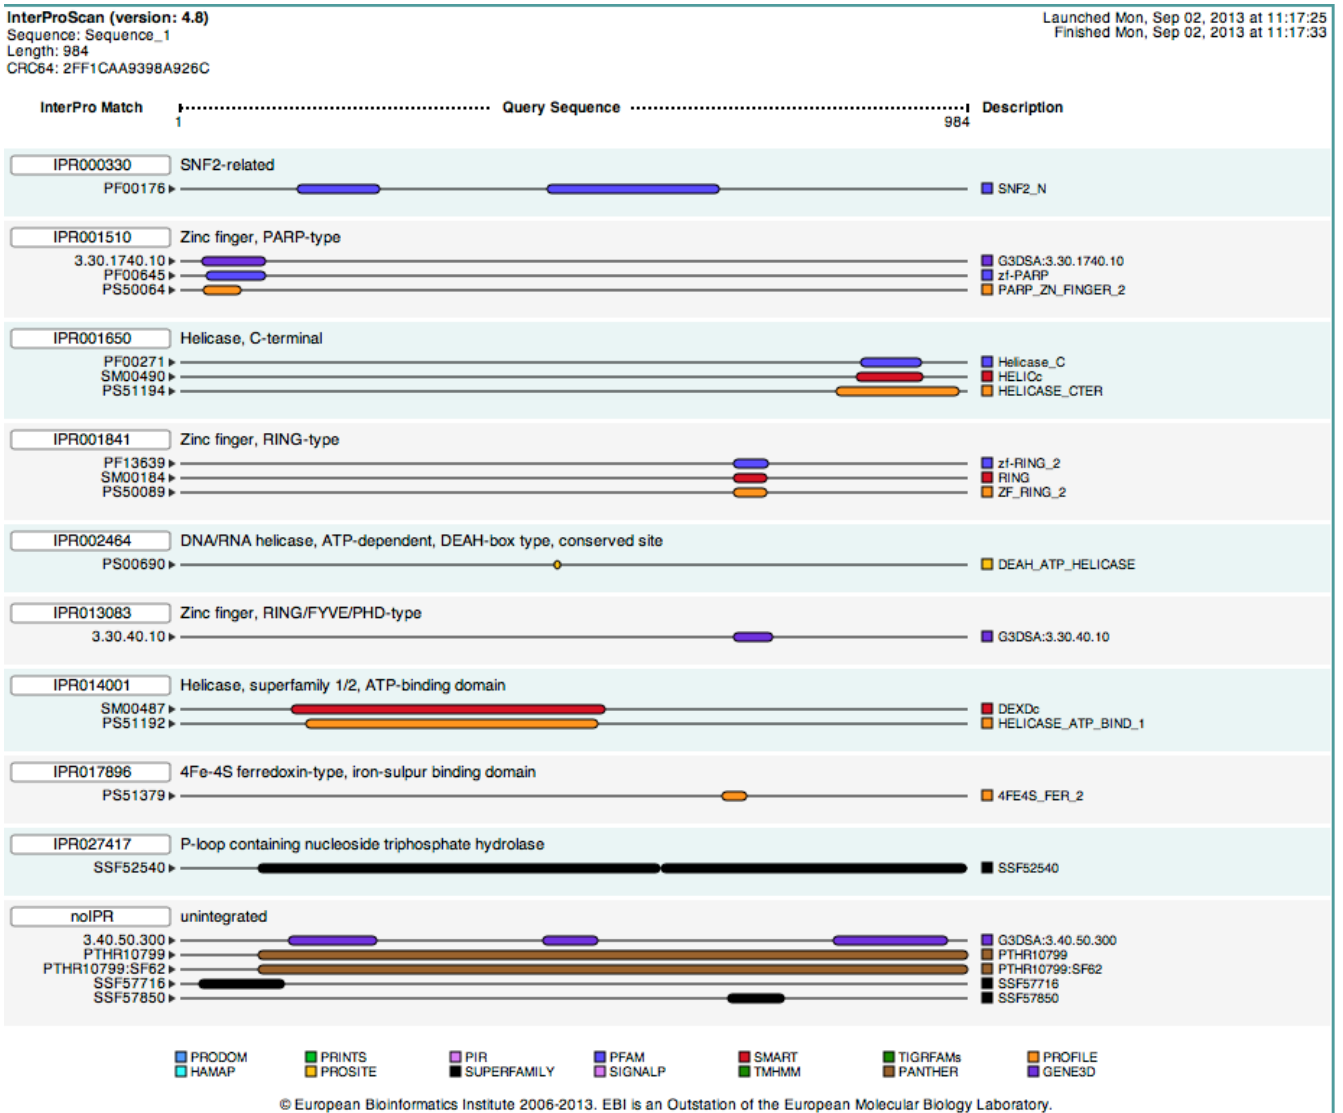

# Tb927.11.760

## PROTEIN PHOSPHATASE 2C (PTHR13832)

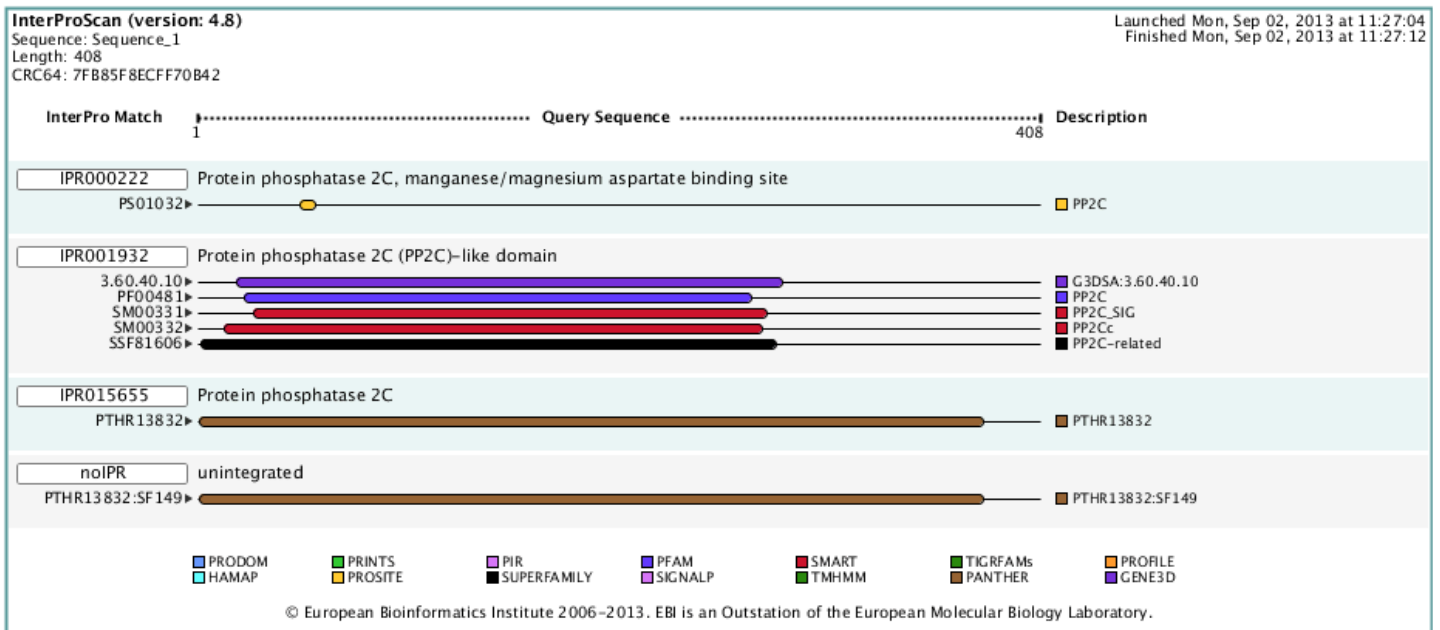

# Tb927.11.4610

## PROTEIN KINASE A REGULATORY SUBUNIT (PTHR11635:SF6)

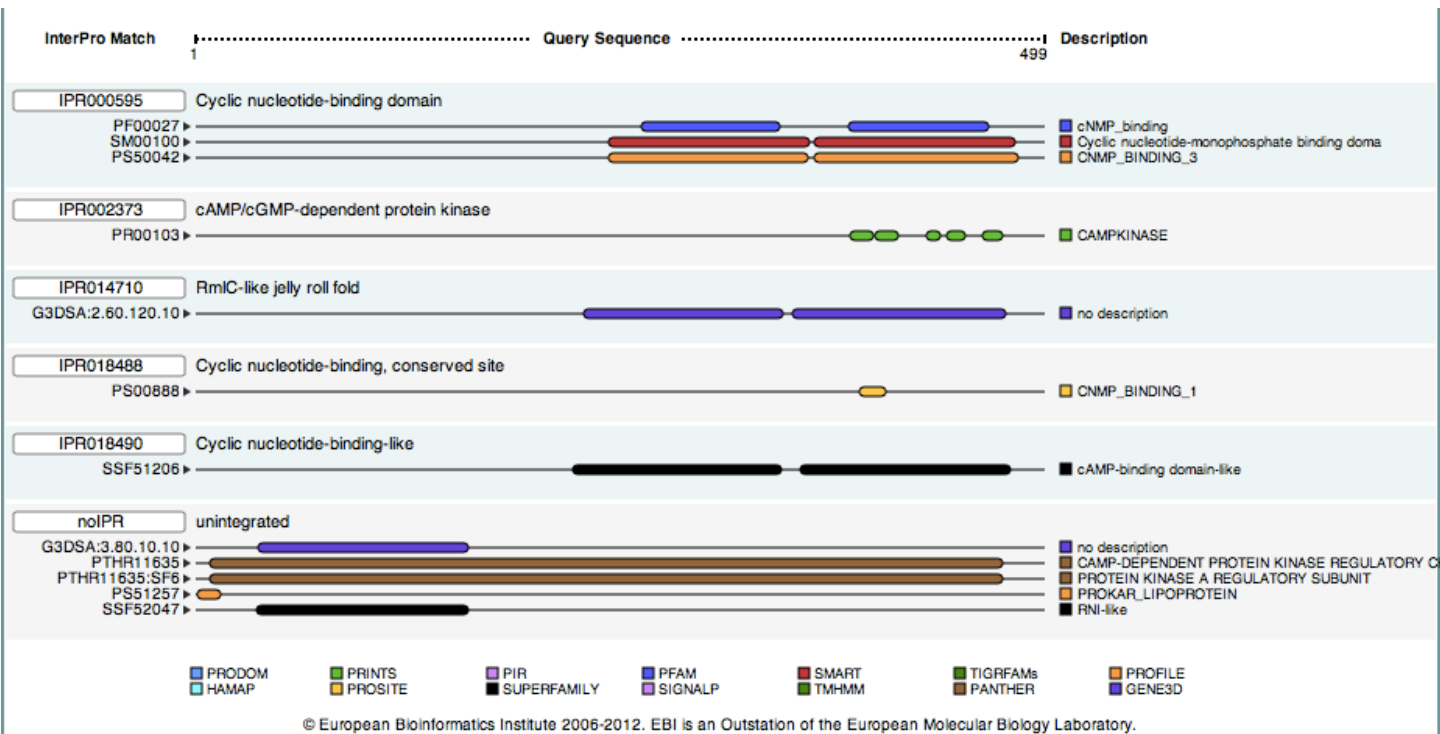

### Reference:

Characterization of a PKA-like kinase from *Trypanosoma brucei*. Susanne Kramer. Dissertation for the Ludwig-Maximilians-University, Munich
